# Supplementary material for: Maternal High-Fat–High-Carbohydrate Diet-Induced Obesity Is Associated with Increased Appetite in Peripubertal Male but Not Female C57Bl/6J Mice
Source: PubMed Central journal article supplement (PMC7598591; doi:10.3390/nu12102919), 2020-09-24
Supplement: nutrients-12-02919-s001.pdf [file nutrients-12-02919-s001.pdf]

## Supplemental Table 1. RT-qPCR Gene Targets

| Gene Name                                       | Gene Symbol  | Assay ID      | Catalog # |
|-------------------------------------------------|--------------|---------------|-----------|
| corticotropin releasing hormone                 | <i>Crh</i>   | Mm04206019_m1 | 4331182   |
| estrogen related receptor alpha                 | <i>Esrra</i> | Mm00433143_m1 | 4331182   |
| insulin receptor                                | <i>Insr</i>  | Mm01211875_m1 | 4331182   |
| leptin receptor                                 | <i>Lepr</i>  | Mm00440181_m1 | 4331182   |
| melanocortin 4 receptor                         | <i>Mc4r</i>  | Mm00457483_s1 | 4331182   |
| neuropeptide Y                                  | <i>Npy</i>   | Mm01410146_m1 | 4331182   |
| nuclear receptor subfamily 3, group C, member 1 | <i>Nr3c1</i> | Mm00433832_m1 | 4331182   |
| pro-opiomelanocortin-alpha                      | <i>Pomc</i>  | Mm00435874_m1 | 4331182   |

TaqMan gene expression assays purchased from ThermoFisher Scientific, Carlsbad, CA.

**Supplemental Table 2.** Maternal Relationship with Male Offspring Energy Homeostasis

|                                     | Meal Size (g) | Meal Frequency (#) | Energy Expenditure | Hypothalamic <i>Insr</i> | Hypothalamic <i>Lepr</i> | Hypothalamic <i>Nr3c1</i> | Hypothalamic <i>Pomc</i> | Hypothalamic <i>Npy</i> |
|-------------------------------------|---------------|--------------------|--------------------|--------------------------|--------------------------|---------------------------|--------------------------|-------------------------|
| <b>Pregnancy</b>                    |               |                    |                    |                          |                          |                           |                          |                         |
| Body weight (conception), g         | NS            | NS                 | NS                 | (-) 0.57**               | NS                       | NS                        | NS                       | NS                      |
| Body weight (delivery), g           | NS            | NS                 | (+) 0.94*          | NS                       | (+) 0.56**               | NS                        | NS                       | (-) 0.58**              |
| <b>Consumption</b>                  |               |                    |                    |                          |                          |                           |                          |                         |
| Energy intake (pregnancy), kcal/day | NS            | NS                 | (+) 0.94*          | (-) 0.56**               | (+) 0.55**               | NS                        | NS                       | NS                      |
| Energy intake (lactation), kcal/day | NS            | NS                 | (+) 0.94*          | (-) 0.54**               | NS                       | NS                        | NS                       | NS                      |
| <b>Metabolic</b>                    |               |                    |                    |                          |                          |                           |                          |                         |
| Cholesterol, mg/dL                  | NS            | NS                 | NS                 | NS                       | NS                       | NS                        | NS                       | NS                      |
| Insulin, ng/mL                      | NS            | NS                 | NS                 | NS                       | NS                       | NS                        | NS                       | NS                      |
| Leptin, ng/dL                       | NS            | NS                 | NS                 | NS                       | (+) 0.46*                | NS                        | (-) 0.46*                | NS                      |
| NEFA, mEq/L                         | NS            | NS                 | NS                 | NS                       | NS                       | NS                        | NS                       | NS                      |
| Phospholipids, mg/dL                | NS            | NS                 | NS                 | NS                       | NS                       | NS                        | NS                       | NS                      |
| Triglycerides, mg/dL                | NS            | NS                 | NS                 | NS                       | NS                       | NS                        | NS                       | NS                      |

Results are expressed as correlation coefficient (R), \*\* p<0.05, \*p=0.05-0.09, p>0.1 recorded as nonsignificant (NS). NEFA: nonesterified fatty acids; *Insr* : mRNA expression of hypothalamic insulin receptor; *Lepr*: mRNA expression of hypothalamic leptin receptor; *Nr3c1* : mRNA expression of hypothalamic glucocorticoid receptor; *Pomc*: mRNA expression of hypothalamic proopiomelanocortin (satiety neuropeptide); *Npy* : mRNA expression of hypothalamic neuropeptide y (hunger neuropeptide). N=3-5 (meal size, meal frequency, and energy expenditure); N=13-16 (*Insr*, *Lepr*, *Nr3c1*, *Pomc*, *Npy*).

**Supplemental Table 3. Offspring Energy Homeostasis Relationship with Hypothalamic Appetite Signaling**

|                                       | Meal Size (g) | Meal       | Energy     |
|---------------------------------------|---------------|------------|------------|
| <b>Appetite Hypothalamic Receptor</b> |               |            |            |
| Hypothalamic <i>Insr</i>              | NS            | (-) 0.89** | NS         |
| Hypothalamic <i>Lepr</i>              | NS            | NS         | NS         |
| Hypothalamic <i>Nr3c1</i>             | NS            | NS         | NS         |
| <b>Appetite Neuropeptide</b>          |               |            |            |
| Hypothalamic <i>Pomc</i>              | NS            | NS         | NS         |
| Hypothalamic <i>Npy</i>               | NS            | NS         | NS         |
| <b>Peripheral Hormone</b>             |               |            |            |
| Insulin, ng/mL                        | NS            | (+) 0.99*  | NS         |
| Leptin, ng/dL                         | NS            | NS         | NS         |
| Corticosterone, ng/dL                 | (+) 0.99**    | NS         | NS         |
| NEFA, mEq/L                           | NS            | NS         | (-) 0.99*  |
| Phospholipids, mg/dL                  | NS            | NS         | (+) 0.99** |

Results are expressed as correlation coefficient (R), \*\* p<0.05, \*p=0.05-0.09, p>0.1 recorded as nonsignificant (NS). NEFA: nonesterified fatty acids; *Insr* : mRNA expression of hypothalamic insulin receptor; *Lepr*: mRNA expression of hypothalamic leptin receptor; *Nr3c1* : mRNA expression of hypothalamic glucocorticoid receptor; *Pomc*: mRNA expression of hypothalamic proopiomelanocortin (satiety neuropeptide); *Npy* : mRNA expression of hypothalamic neuropeptide y (hunger neuropeptide). N=3-5.
